# Supplementary material for: Alleviation of Cognitive Impairment-like Behaviors, Neuroinflammation, Colitis, and Gut Dysbiosis in 5xFAD Transgenic and Aged Mice by Lactobacillus mucosae and Bifidobacterium longum
Source: MDPI journal article supplement (doi:10.3390/nu15153381), 2023-07-29
Supplement: s1 [file s1]

[Supplement]

**Alleviation of cognitive compairment-like behaviors, neuroinflammation, colitis, and gut dysbiosis in 5xFAD transgenic and aged mice by *Lactobacillus mucosae* and *Bifidobacterium longum***

**Table S1.** Effects of NK1, NK46, and NKc on the gut microbiota composition at the phylum level

| Taxon Name           | Composition (%) <sup>1)</sup> |           |                      |                      |                      |
|----------------------|-------------------------------|-----------|----------------------|----------------------|----------------------|
|                      | NC                            | Tg        | TgL                  | TgB                  | TgC                  |
| Bacteroidetes        | 53.2±19.5                     | 48.5±15.1 | 67.5±10.4            | 48.9±13.9            | 54.5±21.2            |
| Firmicutes           | 43.9±19.2                     | 40.8±17.5 | 30.0±11.2            | 48.8±13.5            | 43.1±20.8            |
| Proteobacteria       | 1.9±0.5                       | 4.3±2.1*  | 1.9±0.9 <sup>#</sup> | 1.5±1.0 <sup>#</sup> | 1.6±1.3 <sup>#</sup> |
| Actinobacteria       | 0.5±0.2                       | 1.3±1.1   | 0.4±0.5              | 0.5±0.2              | 0.5±0.3              |
| Tenericutes          | 0.3±0.3                       | 0.5±0.4   | 0.2±0.2              | 0.2±0.2              | 0.2±0.2              |
| Cyanobacteria        | 0.1±0.1                       | 0.3±0.2*  | 0.0±0.0 <sup>#</sup> | 0.1±0.1 <sup>#</sup> | 0.1±0.1 <sup>#</sup> |
| Verrucomicrobia      | 0.0±0.0                       | 3.8±3.0*  | 0.0±0.0 <sup>#</sup> | 0.0±0.0 <sup>#</sup> | 0.0±0.0 <sup>#</sup> |
| Deferribacteres      | 0.0±0.0                       | 0.5±0.7   | 0.0±0.0              | 0.0±0.0              | 0.0±0.0              |
| Saccharibacteria_TM7 | 0.0±0.0                       | 0.0±0.0   | 0.0±0.0              | 0.0±0.0              | 0.0±0.0              |
| Bacteria-uc          | 0.0±0.0                       | 0.0±0.0   | 0.0±0.0              | 0.0±0.0              | 0.0±0.0              |
| Fusobacteria         | 0.0±0.0                       | 0.0±0.0   | 0.0±0.0              | 0.0±0.0              | 0.0±0.0              |

<sup>1)</sup> Mean ± SD. <sup>#</sup>p<0.05 vs. Nc. \*p<0.05 vs. Tg.

**Table S2.** Effects of NK1, NK46, and NKc on the gut microbiota composition at the family level

| Taxon Name          | Composition (%) <sup>1)</sup> |           |                      |                      |                      |
|---------------------|-------------------------------|-----------|----------------------|----------------------|----------------------|
|                     | NC                            | Tg        | TgL                  | TgB                  | TgC                  |
| Muribaculaceae      | 47.1±17.9                     | 34.8±11.7 | 48.6±12.5            | 35.3±12.5            | 37.7±15.7            |
| Lachnospiraceae     | 30.5±16.0                     | 27.9±18.0 | 21.5±10.2            | 36.9±13.0            | 26.6±18.6            |
| Ruminococcaceae     | 4.5±1.6                       | 8.4±2.4*  | 3.3±2.2 <sup>#</sup> | 6.5±1.9              | 4.0±2.7 <sup>#</sup> |
| Lactobacillaceae    | 3.3±2.6                       | 2.1±1.3   | 4.2±4.0              | 4.0±2.3              | 11.3±22.5            |
| Erysipelotrichaceae | 3.1±4.8                       | 1.7±1.4   | 0.1±0.1 <sup>#</sup> | 0.1±0.1 <sup>#</sup> | 0.1±0.1 <sup>#</sup> |
| Prevotellaceae      | 2.5±2.2                       | 8.8±3.2*  | 6.5±6.2              | 3.1±3.1 <sup>#</sup> | 3.9±4.4              |
| Christensenellaceae | 2.0±3.0                       | 0.4±0.1   | 0.6±0.4              | 0.5±0.3              | 0.7±0.4              |
| Rikenellaceae       | 1.5±0.7                       | 1.6±0.8   | 2.5±1.2              | 2.3±0.5              | 4.8±4.2              |
| Bacteroidaceae      | 1.1±0.9                       | 2.7±1.6   | 5.9±4.5              | 3.2±0.8              | 4.5±3.9              |
| Desulfovibrionaceae | 0.8±0.5                       | 2.2±2.2   | 0.8±0.4              | 0.4±0.3              | 0.8±0.7              |
| Odoribacteraceae    | 0.8±0.7                       | 0.3±0.2   | 3.0±1.6 <sup>#</sup> | 3.5±2.1 <sup>#</sup> | 3.2±3.1              |
| Helicobacteraceae   | 0.6±0.4                       | 0.7±0.7   | 0.2±0.3              | 0.4±0.6              | 0.5±0.7              |
| Coriobacteriaceae   | 0.4±.2                        | 0.4±0.2   | 0.2±0.1              | 0.2±0.0              | 0.4±0.2              |
| Sutterellaceae      | 0.4±0.4                       | 1.1±0.9   | 0.9±0.8              | 0.5±0.4              | 0.2±0.3              |
| Clostridiaceae      | 0.2±0.2                       | 0.0±0.0*  | 0.0±0.1              | 0.0±0.0 <sup>#</sup> | 0.1±0.2              |
| Acholeplasmataceae  | 0.2±0.3                       | 0.3±0.2   | 0.2±0.2              | 0.1±0.1 <sup>#</sup> | 0.1±0.2              |

|                    |         |          |                      |                      |                      |
|--------------------|---------|----------|----------------------|----------------------|----------------------|
| Dehalobacterium-f  | 0.2±0.1 | 0.2±0.1  | 0.1±0.1              | 0.2±0.1              | 0.1±0.1              |
| Bifidobacteriaceae | 0.1±.1  | 1.0±0.9  | 0.2±0.4              | 0.2±0.2              | 0.1±0.2              |
| Porphyromonadaceae | 0.1±0.1 | 0.3±0.3  | 0.2±0.2              | 0.2±0.1              | 0.1±0.1              |
| Mogibacterium-f    | 0.1±0.1 | 0.1±0.0  | 0.0±0.0 <sup>#</sup> | 0.0±0.0 <sup>#</sup> | 0.1±0.0              |
| Enterobacteriaceae | 0.1±0.1 | 0.0±0.0  | 0.0±0.0              | 0.0±0.0              | 0.0±0.0              |
| AC160630-f         | 0.1±0.0 | 0.0±0.0* | 0.3±0.1 <sup>#</sup> | 0.2±0.2              | 0.2±0.2              |
| FR888536-f         | 0.1±0.1 | 0.3±0.2* | 0.0±0.0 <sup>#</sup> | 0.1±0.1 <sup>#</sup> | 0.1±0.1 <sup>#</sup> |
| PAC001057-f        | 0.1±0.1 | 0.2±0.2  | 0.0±0.0              | 0.1±0.1              | 0.0±0.0 <sup>#</sup> |
| Streptococcaceae   | 0.1±0.1 | 0.0±0.0  | 0.0±0.0              | 0.0±0.0              | 0.0±0.1              |

<sup>1)</sup> Mean ± SD. <sup>#</sup>p<0.05 vs. Yg. \*p<0.05 vs. Tg.

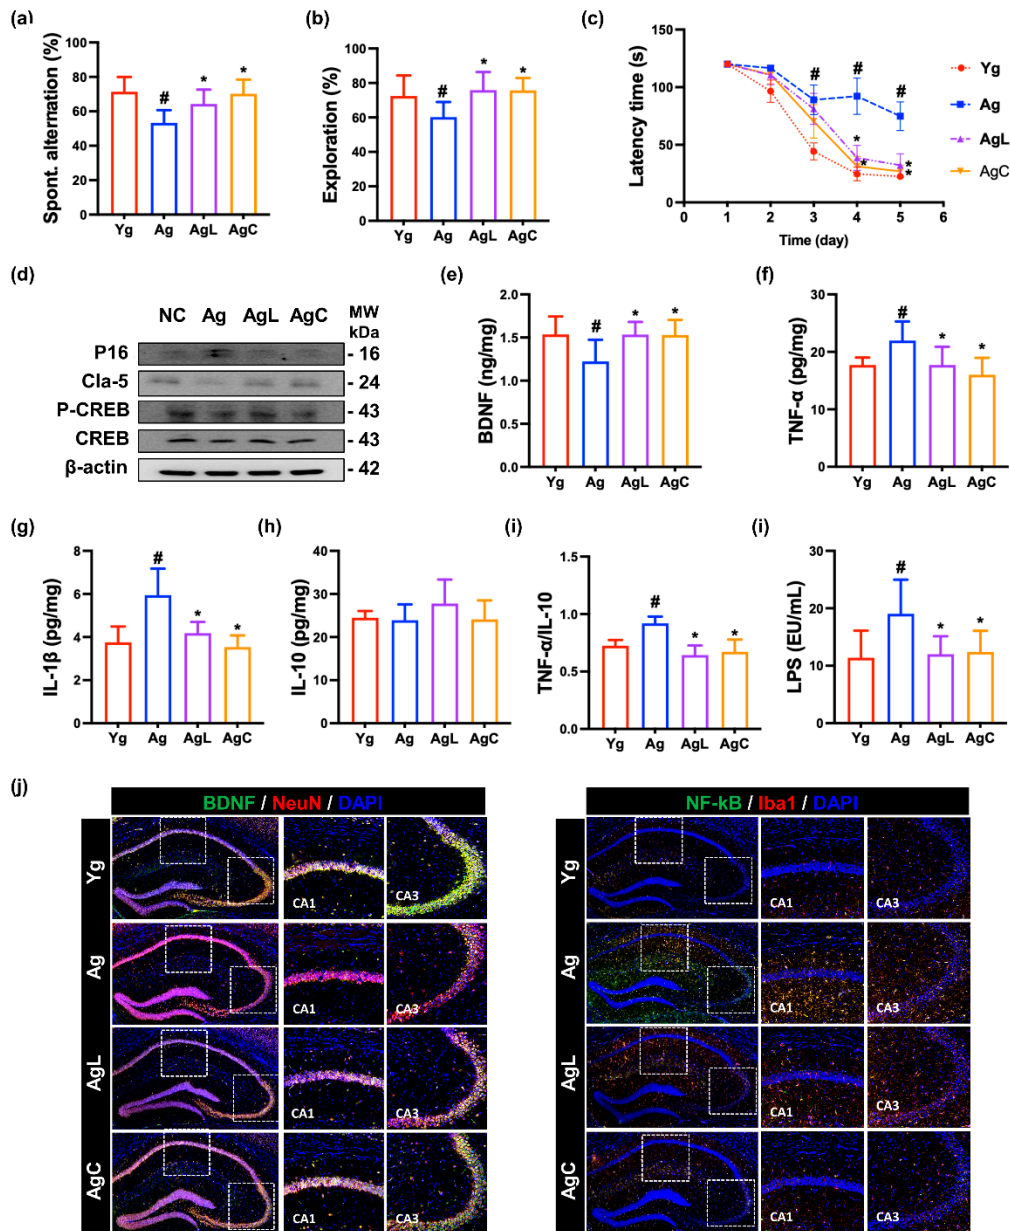

Figure S1. Effects of NK41 and NKc on cognitive function in aged (Ag) mice. Effects on spontaneous alternation in the Y-maze test (a), exploration in the novel object recognition test (b), and latency in Barnes maze task (c). (d) Effects on p16, claudin (Cla)-5, p-CREB, CREB, and  $\beta$ -action, assessed by immunoblotting. Effects on BDNF (e), TNF- $\alpha$  (f), IL-1 $\beta$  (g), and IL-10 (h) expression and TNF- $\alpha$  to IL-10 expression ratio (i), assessed by ELISA. (j) Effects on BDNF<sup>+</sup>NeuN<sup>+</sup> and NF- $\kappa$ B<sup>+</sup>Iba1<sup>+</sup> cell populations in the hippocampus, assessed by immunostaining. Test agents (Ag, vehicle; Ag41,  $1 \times 10^9$  CFU/mouse/day of NK41; TgC,  $1 \times 10^9$  CFU/mouse/day of NKc) were orally administered. Young mice (Yg) were treated with vehicle instead of test agents. Data were described as mean  $\pm$  SD (n = 6). #p<0.05 vs. Yg. \*p<0.05 vs. Ag.

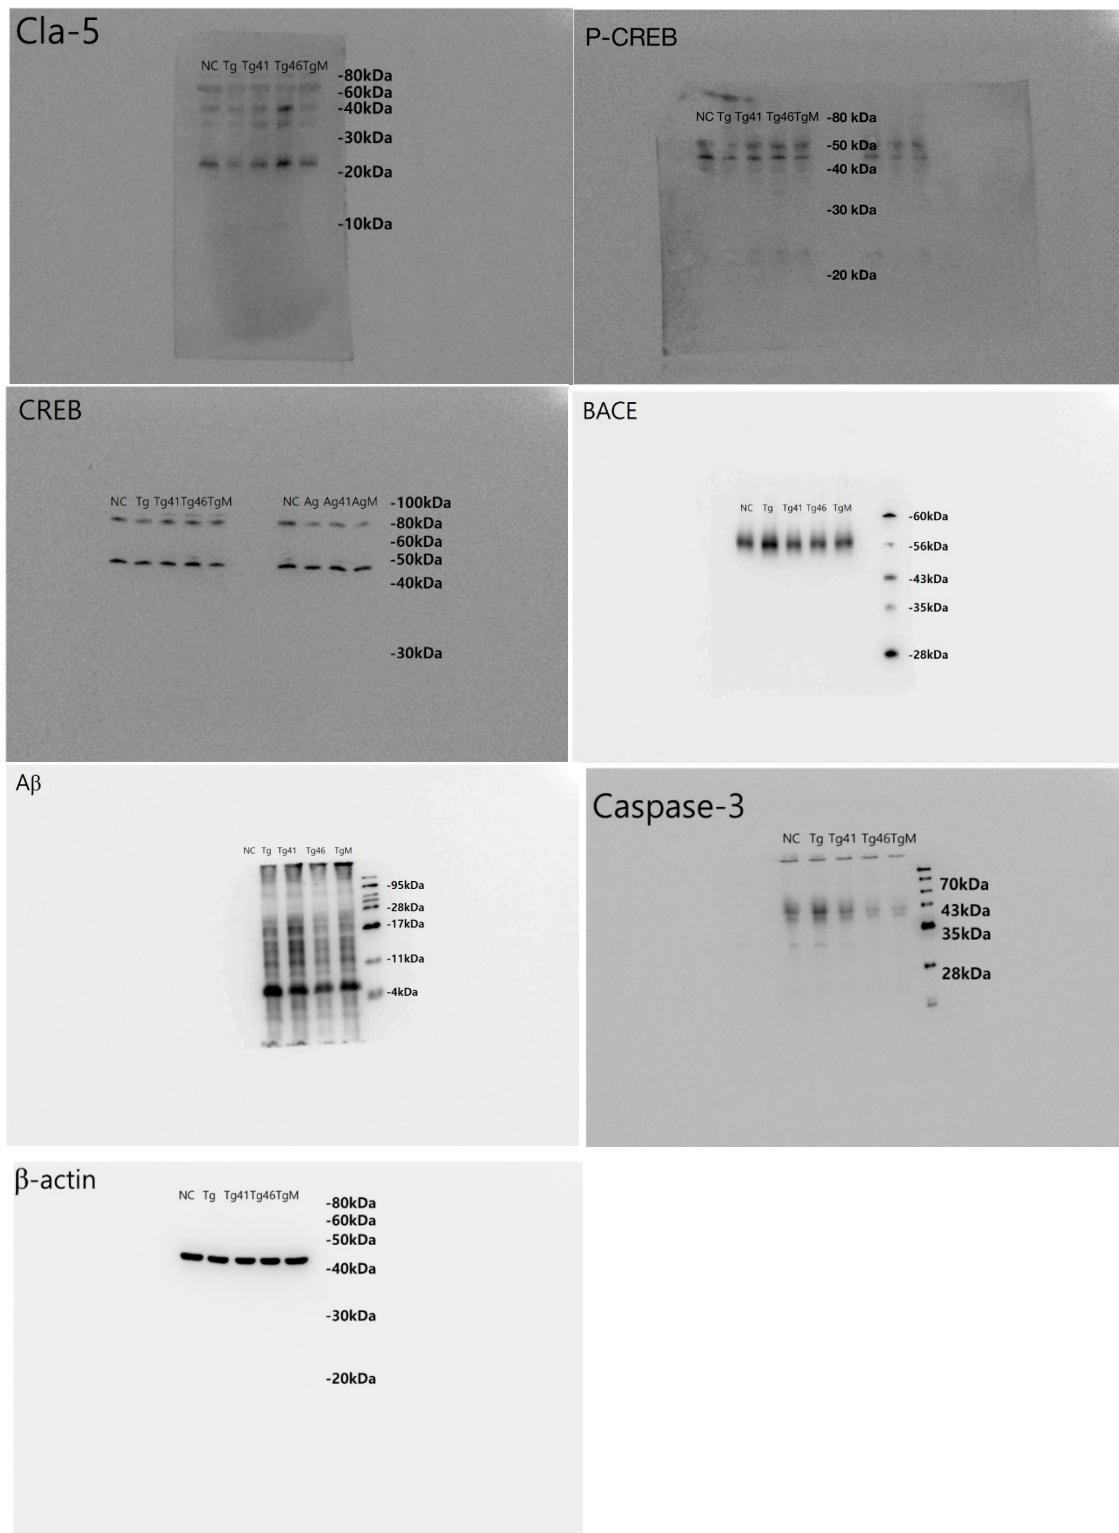

Figure S2. Effect of NK41, NK46, and NKc on amyloid- $\beta$  ( $A\beta$ ), BACE, claudin (Cla)-5, p-CREB, CREB, caspase-3, and  $\beta$ -actin expression in the hippocampus, assessed by immunoblotting (in Figure 3d). Test agents (Tg, vehicle; Tg41 (TgL),  $1 \times 10^9$  CFU/mice/day of NK41; Tg46 (TgB),  $1 \times 10^9$  CFU/mice/day of NK46; TgM (TgC),  $1 \times 10^9$  CFU/mice/day of NKc) were orally administered. Normal control mice (NC) were treated with vehicle instead of test agents.

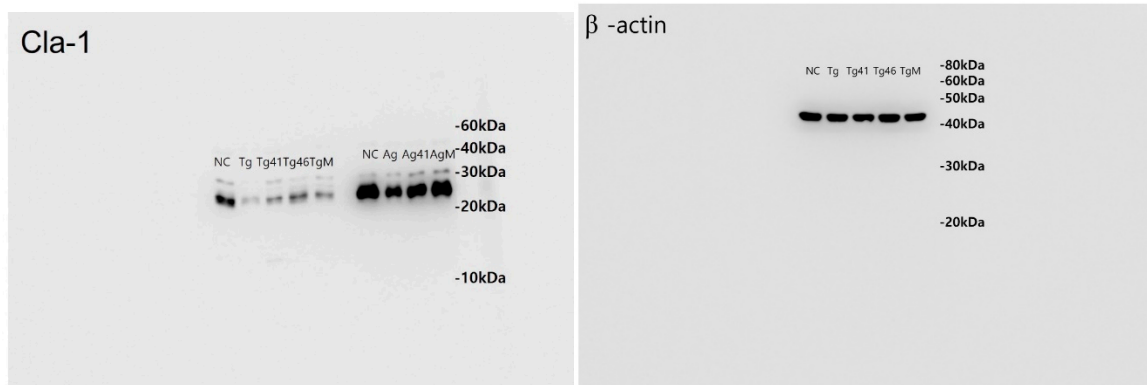

**Figure S3.** Effect of claudin (Cla)-1 and  $\beta$ -actin expression in the hippocampus, assessed by immunoblotting (in Figure 4g). Test agents (Tg, vehicle; Tg41 (TgL),  $1 \times 10^9$  CFU/mice/day of NK41; Tg46 (TgB),  $1 \times 10^9$  CFU/mice/day of NK46; TgM (TgC),  $1 \times 10^9$  CFU/mice/day of NKm) were orally administered. Normal control mice (NC) were treated with vehicle instead of test agents.
